# Supplementary material
Source: PubMed Central journal article supplement (PMC1892941)
Supplement: pnas_0608779104_3.pdf [file pnas_0608779104_3.pdf]

Co-IP with  $\alpha$ -HA

Total Extract

|          |    |    |        |     |      |    |    |
|----------|----|----|--------|-----|------|----|----|
| RPS5:myc | FL | CC | CC-NBS | NBS | LRRs | EV | FL |
| RPS5:HA  | +  | +  | +      | +   | +    | +  | EV |

|    |    |        |     |      |    |    |
|----|----|--------|-----|------|----|----|
| FL | CC | CC-NBS | NBS | LRRs | FL | EV |
| +  | +  | +      | +   | +    | EV | +  |

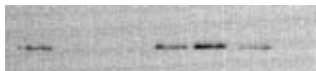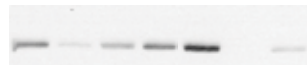

$\alpha$ -HA

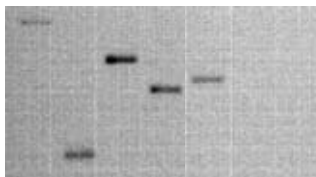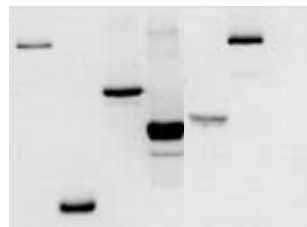

$\alpha$ -cMyc
