# Supplementary material
Source: PubMed Central journal article supplement (PMC1892941)

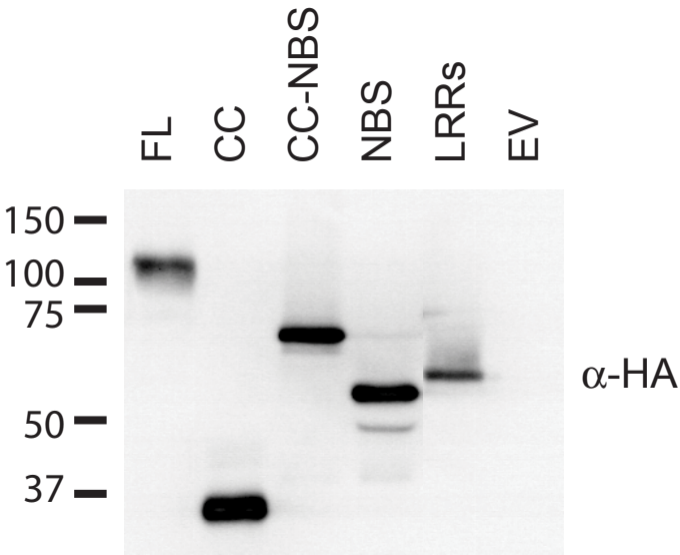

Supplement: pnas_0608779104_1.pdf [file pnas_0608779104_1.pdf]

**A**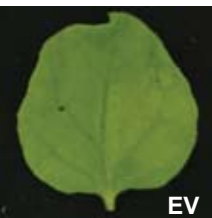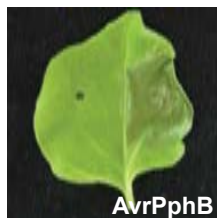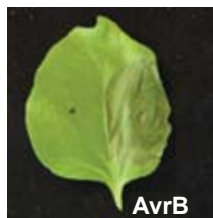**B**

RPS5:Myc + PBS1:HA

AvrPphB

-

+

-

AvrB

-

-

+

EV

+

-

-

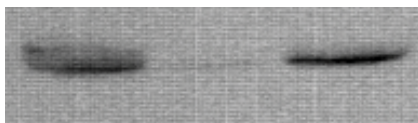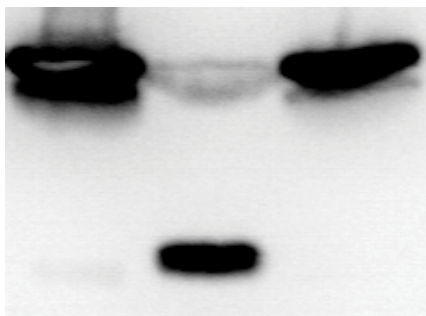

Supplement: pnas_0608779104_2.pdf [file pnas_0608779104_2.pdf]

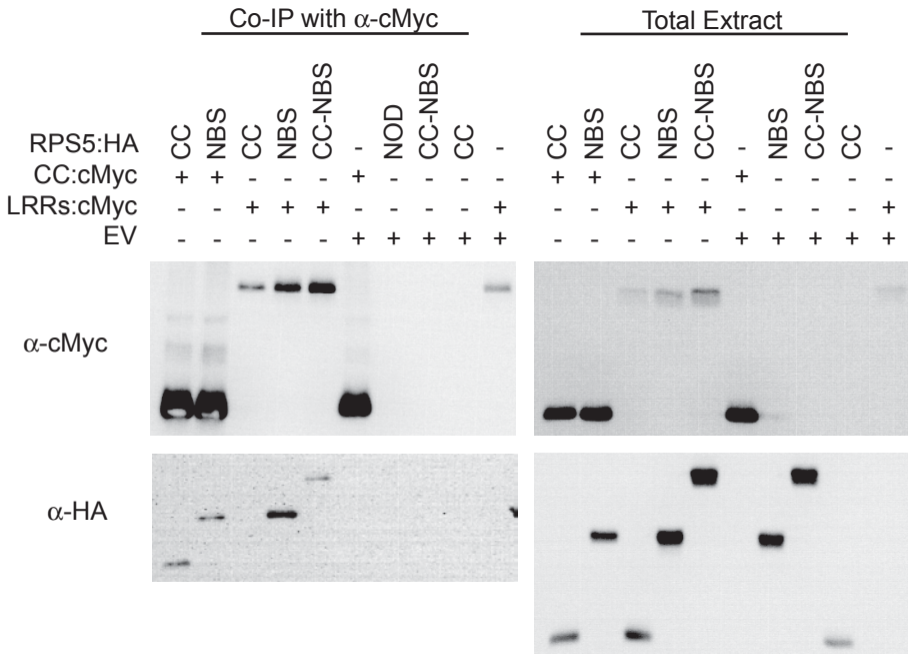

Supplement: pnas_0608779104_4.pdf [file pnas_0608779104_4.pdf]
